# Supplementary material for: Impact of Extraction Method on the Detection of Quality Biomarkers in Normal vs. DFD Meat
Source: MDPI journal article supplement (doi:10.3390/foods10051097), 2021-05-15
Supplement: s1 [file s1]

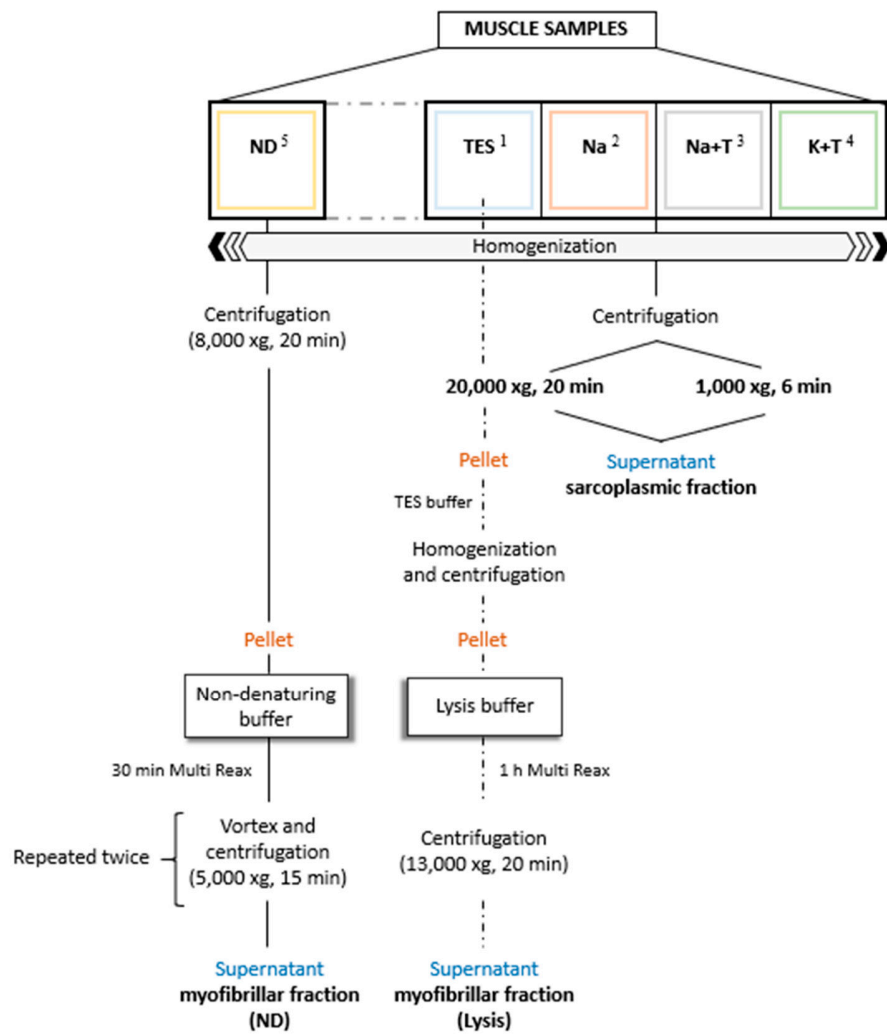

**Figure S1.** Flowchart of the different extraction methods for sarcoplasmic and myofibrillar proteins from beef muscle.  
<sup>1</sup>TES: TES buffer; <sup>2</sup>: Na: sodium phosphate buffer; <sup>3</sup>:Na+T: sodium phosphate buffer with Triton X-100; <sup>4</sup>:K+T: potassium phosphate buffer with Triton X-100 ; <sup>5</sup>:ND: non-denaturing extraction.

**Table S1.** Effect of extraction method (TES 1000, TES 20,000, Na 1000, Na 20,000, Na+T 1000, Na+T 20,000, K+T 1000 and K+T 20,000), type of sample (CONTROL *vs.* DFD) and their interaction on sarcoplasmic subproteome bands' intensity (optical density in arbitrary units).

| Sarcoplasmic<br>bands<br>(MWe <sup>1</sup> ) | TES 1000 |       | TES 20,000 |       | Na 1000 |       | Na 20,000 |       | Na+T 1000 |       | Na+T 20,000 |       | K+T 1000 |       | K+T 20,000 |       | SEM   | Significance |     |       |
|----------------------------------------------|----------|-------|------------|-------|---------|-------|-----------|-------|-----------|-------|-------------|-------|----------|-------|------------|-------|-------|--------------|-----|-------|
|                                              | CONTROL  | DFD   | CONTROL    | DFD   | CONTROL | DFD   | CONTROL   | DFD   | CONTROL   | DFD   | CONTROL     | DFD   | CONTROL  | DFD   | CONTROL    | DFD   |       | E            | T   | E x T |
| S1 (171.1 kDa)                               | 0.322    | 1.374 | 0.488      | 1.459 | 1.551   | 2.027 | 1.675     | 1.963 | 2.310     | 1.876 | 1.857       | 2.764 | 2.326    | 1.399 | 2.500      | 1.67  | 0.213 | ***          | NS  | **    |
| S2 (137.9 kDa)                               | 0.127    | 0.249 | 0.165      | 0.256 | 0.224   | 0.268 | 0.214     | 0.309 | 0.43      | 0.431 | 0.372       | 0.519 | 0.415    | 0.425 | 0.278      | 0.352 | 0.61  | *            | NS  | NS    |
| S3 (115.8 kDa)                               | 0.163    | 0.446 | 0.155      | 0.344 | 0.335   | 0.477 | 0.298     | 0.388 | 0.876     | 0.63  | 0.824       | 0.998 | 0.528    | 0.676 | 0.322      | 0.518 | 0.084 | ***          | *   | NS    |
| S4 (95.3 kDa)                                | 3.156    | 5.6   | 3.350      | 5.771 | 5.059   | 5.241 | 5.771     | 5.192 | 4.526     | 4.046 | 5.136       | 5.318 | 4.722    | 3.865 | 4.857      | 3.622 | 0.32  | *            | NS  | ***   |
| S5 (87.9 kDa)                                | 0.382    | 0.593 | 0.597      | 1.150 | 0.647   | 0.99  | 1.323     | 1.631 | 1.109     | 0.807 | 1.958       | 1.585 | 1.021    | 0.974 | 1.754      | 1.719 | 0.382 | NS           | NS  | NS    |
| S6 (81.31 kDa)                               | 0.443    | 0.657 | 0.553      | 0.591 | 1.190   | 1.920 | 1.144     | 1.368 | 1.455     | 1.428 | 1.321       | 1.797 | 1.783    | 1.625 | 1.466      | 1.497 | 0.146 | ***          | NS  | NS    |
| S8 (62.48 kDa)                               | 2.931    | 2.637 | 2.961      | 2.745 | 2.93    | 2.74  | 2.958     | 2.519 | 2.942     | 2.847 | 3.029       | 2.84  | 2.924    | 2.272 | 2.643      | 2.502 | 0.123 | NS           | **  | NS    |
| S10 (53.60 kDa)                              | 0.756    | 1.034 | 0.923      | 1.061 | 0.985   | 1.011 | 1.012     | 1.049 | 1.225     | 1.448 | 1.25        | 1.399 | 1.224    | 1.198 | 1.091      | 1.303 | 0.087 | **           | *   | NS    |
| S11 (50.70 kDa)                              | 1.364    | 1.163 | 1.126      | 1.087 | 1.255   | 1.232 | 1.209     | 1.235 | 1.483     | 1.392 | 1.619       | 1.741 | 1.786    | 1.420 | 1.531      | 1.691 | 0.086 | ***          | NS  | NS    |
| S12 (45.55 kDa)                              | 8.409    | 8.078 | 9.198      | 8.428 | 7.687   | 8.515 | 8.381     | 7.293 | 7.677     | 7.394 | 6.614       | 7.485 | 7.559    | 7.388 | 6.89       | 6.858 | 0.351 | **           | NS  | NS    |
| S13 (40.72 kDa)                              | 10.617   | 10.99 | 10.34      | 10.55 | 9.696   | 10.62 | 10.49     | 9.813 | 9.189     | 9.326 | 9.332       | 9.348 | 8.792    | 8.235 | 9.029      | 8.932 | 0.427 | **           | NS  | NS    |
| S14 (37.6 kDa)                               | 8.947    | 8.603 | 8.983      | 8.432 | 9.474   | 9.099 | 9.635     | 8.685 | 8.365     | 8.682 | 8.334       | 8.492 | 8.418    | 7.942 | 8.499      | 8.191 | 0.242 | *            | NS  | NS    |
| S15 (34.74 kDa)                              | 11.212   | 10.51 | 10.86      | 10.06 | 11.84   | 11.34 | 11.55     | 11.21 | 10.52     | 10.96 | 9.488       | 10.05 | 10.46    | 10.23 | 9.728      | 9.985 | 0.241 | ***          | NS  | NS    |
| S16 (32.14 kDa)                              | 8.765    | 7.491 | 8.764      | 7.394 | 6.728   | 6.615 | 7.100     | 6.656 | 6.425     | 6.634 | 6.097       | 6.175 | 6.738    | 6.154 | 6.499      | 6.261 | 0.211 | ***          | **  | NS    |
| S17 (29.74 kDa)                              | 1.650    | 1.502 | 1.738      | 1.913 | 2.151   | 2.646 | 2.418     | 3.251 | 2.495     | 2.804 | 2.430       | 2.924 | 2.914    | 3.646 | 2.909      | 3.448 | 0.109 | ***          | *** | NS    |
| S18 (28.41 kDa)                              | 1.521    | 1.352 | 1.627      | 1.479 | 0.976   | 1.393 | 1.070     | 1.315 | 1.067     | 1.506 | 1.072       | 1.229 | 1.351    | 1.52  | 1.337      | 1.49  | 0.073 | ***          | **  | *     |
| S19 (26.68 kDa)                              | 3.163    | 2.615 | 3.162      | 2.618 | 2.223   | 2.292 | 2.672     | 2.419 | 2.421     | 2.416 | 2.595       | 2.575 | 2.189    | 2.249 | 2.436      | 2.606 | 0.128 | **           | NS  | NS    |
| S20 (25.76 kDa)                              | 4.395    | 3.929 | 4.275      | 3.936 | 3.588   | 3.681 | 3.605     | 3.717 | 3.556     | 3.294 | 3.471       | 3.187 | 3.458    | 3.506 | 3.623      | 3.342 | 0.133 | ***          | NS  | NS    |
| S21 (24.63 kDa)                              | 4.227    | 3.712 | 4.058      | 3.778 | 3.401   | 3.467 | 3.392     | 3.381 | 3.312     | 3.340 | 3.209       | 3.221 | 3.164    | 2.963 | 3.092      | 3.036 | 0.057 | ***          | **  | *     |

<sup>1</sup>: MWe is the experimental molecular weight (kDa); E: Extractive method; T: Type of sample (CONTROL *vs.* DFD); SEM: standard error of the mean; NS: Not significant; \*  $p < 0.05$ ; \*\*  $p < 0.01$ ; \*\*\*  $p < 0.001$ . TES 1000: TES buffer and 1000× g, 6 min; TES 20,000: TES buffer and 20,000× g, 20 min; Na 1000: sodium phosphate buffer and 1000× g, 6 min; Na 20,000: sodium phosphate buffer and 20,000× g, 20 min; Na+T 1000: sodium phosphate buffer with Triton X-100 and 1000× g, 6 min; Na+T 20,000: sodium phosphate buffer with Triton-X100 and 20,000× g, 20 min; K+T 1000: potassium phosphate buffer with Triton X-100 and 1000× g, 6 min; K+T 20,000: potassium phosphate buffer with Triton X-100 and 20,000× g, 20 min

**Table S2.** The *p*-values for the effect of sample type (CONTROL *vs.* DFD) on the sarcoplasmic subproteome bands intensity (optical density in arbitrary units) obtained with the different extraction methods.

| Sarcoplasmic bands<br>(MWe <sup>1</sup> ) | TES<br>1000     | TES<br>20,000   | Na<br>1000    | Na<br>20,000    | Na+T<br>1000 | Na+T<br>20,000 | K+T<br>1000   | K+T<br>20,000   |
|-------------------------------------------|-----------------|-----------------|---------------|-----------------|--------------|----------------|---------------|-----------------|
| S1 (171.1 kDa)                            | <b>0.001***</b> | <b>0.002**</b>  | <b>0.04**</b> | 0.372           | 0.444        | 0.221          | 0.201         | 0.05            |
| S3 (115.8 kDa)                            | <b>0.007**</b>  | 0.085           | 0.065         | 0.379           | 0.258        | 0.629          | 0.436         | 0.136           |
| S4 (95.3 kDa)                             | <b>0.001***</b> | <b>0.001***</b> | 0.735         | 0.425           | 0.546        | 0.809          | 0.096         | 0.257           |
| S5 (87.9 kDa)                             | <b>0.028*</b>   | <b>0.047*</b>   | 0.523         | 0.722           | 0.583        | 0.739          | 0.944         | 0.975           |
| S8 (62.48 kDa)                            | 0.064           | 0.438           | 0.383         | 0.207           | 0.782        | 0.496          | <b>0.021*</b> | 0.509           |
| S9 (57.6 kDa)                             | <b>0.003**</b>  | <b>0.027*</b>   | 0.768         | 0.488           | 0.664        | 0.833          | 0.621         | 0.891           |
| S10 (53.60 kDa)                           | <b>0.045*</b>   | 0.413           | 0.901         | 0.845           | 0.208        | 0.596          | 0.807         | 0.272           |
| S15 (34.74 kDa)                           | <b>0.004**</b>  | <b>0.04*</b>    | 0.069         | 0.511           | 0.42         | 0.529          | 0.513         | 0.687           |
| S16 (32.14 kDa)                           | <b>0.011*</b>   | <b>0.028*</b>   | 0.686         | 0.369           | 0.637        | 0.891          | 0.195         | 0.567           |
| S17 (29.74 kDa)                           | 0.363           | 0.185           | <b>0.027*</b> | <b>0.000***</b> | 0.402        | 0.151          | <b>0.05*</b>  | <b>0.000***</b> |
| S18 (28.41 kDa)                           | <b>0.03*</b>    | 0.385           | <b>0.019*</b> | 0.23            | 0.019*       | 0.315          | 0.414         | 0.272           |
| S19 (26.68 kDa)                           | <b>0.029*</b>   | 0.057           | 0.833         | 0.193           | 0.982        | 0.962          | 0.702         | 0.573           |
| S20 (25.76 kDa)                           | <b>0.018*</b>   | 0.148           | 0.496         | 0.362           | 0.392        | 0.541          | 0.876         | 0.447           |
| S21 (24.63 kDa)                           | <b>0.011*</b>   | 0.099           | 0.575         | 0.889           | 0.813        | 0.939          | 0.082         | 0.45            |

*p*-values in bold are significant at \*  $p < 0.05$ ; \*\*  $p < 0.01$ ; \*\*\*  $p < 0.001$ . <sup>1</sup>: Mwe is the experimental molecular weight (kDa). TES 1000: TES buffer and 1000× g, 6 min; TES 20,000: TES buffer and 20,000× g, 20 min; Na 1000: sodium phosphate buffer and 1000× g, 6 min; Na 20,000: sodium phosphate buffer and 20,000× g, 20 min; Na+T 1000: sodium phosphate buffer with Triton X-100 and 1000× g, 6 min; Na+T 20,000: sodium phosphate buffer with Triton-X100 and 20,000× g, 20 min; K+T 1000: potassium phosphate buffer with Triton X-100 and 1000× g, 6 min; K+T 20,000: potassium phosphate buffer with Triton X-100 and 20,000× g, 20 min

**Table S3.** Effect of extraction method (Lysis and Non-denaturant), type of sample (CONTROL *vs.* DFD) and their interaction on myofibrillar subproteome bands' intensity (optical density in arbitrary units).

| Myofibrillar bands<br>(MWe <sup>1</sup> ) | Lysis   |        | ND      |       | SEM   | Significance |    |       |
|-------------------------------------------|---------|--------|---------|-------|-------|--------------|----|-------|
|                                           | CONTROL | DFD    | CONTROL | DFD   |       | E            | T  | E x T |
| M2 (170.8 kDa)                            | 1.617   | 1.717  | 2.338   | 2.590 | 0.245 | **           | NS | NS    |
| M3 (143.58 kDa)                           | 3.212   | 3.066  | 5.432   | 6.354 | 0.644 | ***          | NS | NS    |
| M6 (110.53 kDa)                           | 0.855   | 0.583  | 1.104   | 1.029 | 0.112 | *            | NS | NS    |
| M11 (74.77 kDa)                           | 0.935   | 0.856  | 0.590   | 0.410 | 0.09  | ***          | NS | NS    |
| M16 (55.70 kDa)                           | 2.982   | 2.080  | 3.920   | 4.849 | 0.385 | ***          | NS | *     |
| M17 (52.15 kDa)                           | 1.418   | 0.792  | 1.244   | 1.140 | 0.086 | NS           | ** | *     |
| M18 (49.7 kDa)                            | 0.773   | 0.623  | 1.220   | 1.270 | 0.111 | **           | NS | NS    |
| M19 (47.58 kDa))                          | 1.013   | 0.785  | 1.677   | 1.757 | 0.102 | ***          | NS | NS    |
| M20 (41.07 kDa)                           | 14.011  | 14.542 | 9.890   | 8.029 | 2.035 | **           | NS | NS    |
| M23 (34.80 kDa)                           | 5.506   | 5.500  | 4.327   | 4.993 | 0.305 | *            | NS | NS    |
| M24 (32.76 kDa)                           | 4.651   | 5.098  | 6.953   | 7.855 | 0.564 | ***          | NS | NS    |
| M25 ( 29.16 kDa)                          | 1.841   | 1.568  | 1.946   | 1.092 | 0.153 | NS           | *  | NS    |
| M26 (28.48 kDa)                           | 0.987   | 1.234  | 1.254   | 0.792 | 0.097 | NS           | NS | *     |
| M27 (26.31 kDa)                           | 1.514   | 1.418  | 2.182   | 2.074 | 0.065 | ***          | NS | NS    |
| M30 (19.46 kDa)                           | 2.958   | 3.109  | 2.337   | 2.439 | 0.178 | **           | NS | NS    |
| M31 (18.40 kDa)                           | 0.756   | 0.630  | 0.526   | 0.286 | 0.067 | ***          | ** | NS    |
| M32 (17.09 kDa)                           | 2.081   | 2.426  | 2.900   | 3.299 | 0.139 | ***          | *  | NS    |
| M34 (14.94 kDa)                           | 0.906   | 0.729  | 2.478   | 2.151 | 0.122 | ***          | NS | NS    |

<sup>1</sup>: Mwe is the experimental molecular weight (kDa); E: Extraction method; T: Type of sample (CONTROL *vs.* DFD); SEM: standard error of the mean; NS: Not significant; \*  $p < 0.05$ ; \*\*  $p < 0.01$ ; \*\*\*  $p < 0.001$ . Lysis: denaturing extraction with lysis buffer; ND: non-denaturing extraction.

**Table S4.** Effect of meat type (CONTROL *vs.* DFD) within each extraction method (Lysis *vs.* Non-denaturant) on myofibrillar subproteome bands' intensity (optical density in arbitray units).

| Myofibrillar bands (MWe <sup>1</sup> ) | Lysis   |       | Sig. | ND      |       | Sig. |
|----------------------------------------|---------|-------|------|---------|-------|------|
|                                        | CONTROL | DFD   |      | CONTROL | DFD   |      |
| M10 (79.89 kDa)                        | 1.593   | 1.142 | *    | 1.687   | 1.465 | NS   |
| M16 (55.70 kDa)                        | 2.982   | 2.080 | *    | 3.920   | 4.849 | NS   |
| M17 (52.15 kDa)                        | 1.418   | 0.792 | *    | 1.244   | 1.140 | NS   |
| M26 (28.48 kDa)                        | 0.987   | 1.234 | *    | 1.254   | 0.792 | *    |
| M31 (18.40 kDa)                        | 0.756   | 0.630 | *    | 0.526   | 0.286 | *    |
| M32 (17.09 kDa)                        | 2.081   | 2.426 | *    | 2.900   | 3.299 | NS   |
| M34 (14.94 kDa)                        | 0.906   | 0.729 | ***  | 2.478   | 2.151 | NS   |

<sup>1</sup>: Mwe is the experimental molecular weight (kDa); Sig.: Significance. Means within a row and extractive method were significantly different at: \*  $p < 0.05$ ; \*\*\*  $p < 0.001$ . NS: not significant. . Lysis: denaturing extraction with lysis buffer; ND: non-denaturing extraction.
